# Supplementary material
Source: PubMed Central journal article supplement (PMC7433771)
Supplement: NIHMS1617734-supplement-1.pdf [file NIHMS1617734-supplement-1.pdf]

**Supplemental table 1.** Associations of aspirin and other NSAIDs with absolute dense area, by menopausal status

| Intake category                     | All women |                                                 | Premenopausal |                                                 | Postmenopausal |                                                 |
|-------------------------------------|-----------|-------------------------------------------------|---------------|-------------------------------------------------|----------------|-------------------------------------------------|
|                                     | N         | Full Models,<br>$\beta$ and 95% CI <sup>a</sup> | N             | Full Models,<br>$\beta$ and 95% CI <sup>b</sup> | N              | Full Models,<br>$\beta$ and 95% CI <sup>c</sup> |
| <b>ASPIRIN USE</b>                  |           |                                                 |               |                                                 |                |                                                 |
| Regular use ( $\geq 2$ times/week)  |           |                                                 |               |                                                 |                |                                                 |
| Non-users                           | 1348      | Reference                                       | 867           | Reference                                       | 481            | Reference                                       |
| Past users                          | 965       | 0.10 (-0.08, 0.28)                              | 363           | 0.01 (-0.23, 0.26)                              | 602            | 0.17 (-0.09, 0.43)                              |
| Current users                       |           |                                                 |               |                                                 |                |                                                 |
| <5 yrs                              | 339       | 0.35 (0.11, 0.59)                               | 177           | 0.51 (0.20, 0.82)                               | 162            | 0.13 (-0.24, 0.51)                              |
| $\geq 5$ yrs                        | 1023      | 0.09 (-0.10, 0.28)                              | 286           | 0.06 (-0.23, 0.35)                              | 737            | 0.08 (-0.18, 0.34)                              |
| p-trend                             |           | 0.16                                            |               | 0.11                                            |                | 0.83                                            |
| Frequency of use                    |           |                                                 |               |                                                 |                |                                                 |
| Non-users                           | 1343      | Reference                                       | 862           | Reference                                       | 481            | Reference                                       |
| Past users                          | 1072      | 0.12 (-0.06, 0.30)                              | 389           | 0.07 (-0.17, 0.32)                              | 683            | 0.15 (-0.11, 0.41)                              |
| Current users                       |           |                                                 |               |                                                 |                |                                                 |
| 1 day/wk                            | 632       | 0.25 (0.04, 0.46)                               | 264           | 0.36 (0.06, 0.66)                               | 368            | 0.14 (-0.16, 0.45)                              |
| 2-3 days/wk                         | 310       | 0.16 (-0.11, 0.42)                              | 114           | 0.04 (-0.34, 0.43)                              | 196            | 0.19 (-0.18, 0.55)                              |
| 4-5 days/wk                         | 142       | 0.23 (-0.14, 0.59)                              | 37            | 0.36 (-0.28, 1.00)                              | 105            | 0.10 (-0.35, 0.56)                              |
| 6+ days/wk                          | 457       | 0.10 (-0.14, 0.33)                              | 107           | 0.23 (-0.17, 0.62)                              | 350            | 0.02 (-0.28, 0.33)                              |
| p-trend                             |           | 0.47                                            |               | 0.40                                            |                | 0.86                                            |
| Dosage (number of tablets per week) |           |                                                 |               |                                                 |                |                                                 |
| Non-users                           | 759       | Reference                                       | 390           | Reference                                       | 369            | Reference                                       |
| Past users                          |           |                                                 |               |                                                 |                |                                                 |
| <2                                  | 410       | 0.34 (0.06, 0.61)                               | 108           | 0.33 (-0.16, 0.82)                              | 302            | 0.32 (-0.02, 0.65)                              |
| 2-5                                 | 124       | 0.44 (0.03, 0.85)                               | 24            | 0.31 (-0.55, 1.18)                              | 100            | 0.44 (-0.03, 0.91)                              |
| >5                                  | 87        | 0.16 (-0.32, 0.64)                              | 13            | -1.12 (-2.27, 0.02)                             | 74             | 0.39 (-0.14, 0.92)                              |
| p-trend                             |           | 0.74                                            |               | 0.09                                            |                | 0.19                                            |
| Current users                       |           |                                                 |               |                                                 |                |                                                 |
| <2                                  | 450       | 0.29 (0.03, 0.55)                               | 154           | 0.43 (0.01, 0.84)                               | 296            | 0.18 (-0.15, 0.51)                              |
| 2-5                                 | 332       | 0.38 (0.09, 0.67)                               | 65            | 0.23 (-0.33, 0.80)                              | 267            | 0.36 (0.01, 0.70)                               |
| >5                                  | 379       | 0.06 (-0.22, 0.33)                              | 100           | 0.42 (-0.05, 0.89)                              | 279            | -0.15 (-0.49, 0.18)                             |
| p-trend                             |           | 0.94                                            |               | 0.18                                            |                | 0.19                                            |

| Intake category                    | All women |                                                 | Premenopausal |                                                 | Postmenopausal |                                                 |
|------------------------------------|-----------|-------------------------------------------------|---------------|-------------------------------------------------|----------------|-------------------------------------------------|
|                                    | N         | Full Models,<br>$\beta$ and 95% CI <sup>a</sup> | N             | Full Models,<br>$\beta$ and 95% CI <sup>b</sup> | N              | Full Models,<br>$\beta$ and 95% CI <sup>c</sup> |
| Duration (years of use by status)  |           |                                                 |               |                                                 |                |                                                 |
| Non-users                          | 1348      | Reference                                       | 867           | Reference                                       | 481            | Reference                                       |
| Past users                         |           |                                                 |               |                                                 |                |                                                 |
| <2                                 | 36        | -0.03 (-0.69, 0.64)                             | 17            | -0.05 (-0.96, 0.86)                             | 19             | -0.06 (-1.02, 0.89)                             |
| 2-5                                | 433       | 0.08 (-0.14, 0.30)                              | 215           | 0.06 (-0.23, 0.34)                              | 218            | 0.11 (-0.23, 0.44)                              |
| >5                                 | 496       | 0.14 (-0.09, 0.37)                              | 131           | -0.05 (-0.42, 0.33)                             | 365            | 0.23 (-0.07, 0.54)                              |
| p-trend                            |           | 0.40                                            |               | 0.93                                            |                | 0.32                                            |
| Current users                      |           |                                                 |               |                                                 |                |                                                 |
| <2                                 | 142       | 0.23 (-0.12, 0.57)                              | 81            | 0.41 (-0.02, 0.84)                              | 61             | -0.04 (-0.60, 0.51)                             |
| 2-5                                | 253       | 0.37 (0.09, 0.64)                               | 126           | 0.45 (0.09, 0.81)                               | 127            | 0.23 (-0.18, 0.64)                              |
| >5                                 | 967       | 0.10 (-0.09, 0.30)                              | 256           | 0.07 (-0.23, 0.37)                              | 711            | 0.09 (-0.17, 0.36)                              |
| p-trend                            |           | 0.19                                            |               | 0.67                                            |                | 0.28                                            |
| <b>NSAIDs</b>                      |           |                                                 |               |                                                 |                |                                                 |
| Regular use ( $\geq 2$ times/week) |           |                                                 |               |                                                 |                |                                                 |
| Non-users                          | 1310      | Reference                                       | 479           | Reference                                       | 831            | Reference                                       |
| Past users                         | 680       | 0.07 (-0.13, 0.26)                              | 367           | -0.06 (-0.32, 0.21)                             | 313            | 0.19 (-0.10, 0.48)                              |
| Current users                      |           |                                                 |               |                                                 |                |                                                 |
| <5 yrs                             | 877       | 0.07 (-0.11, 0.24)                              | 436           | -0.00 (-0.24, 0.24)                             | 441            | 0.11 (-0.14, 0.35)                              |
| $\geq 5$ yrs                       | 599       | 0.11 (-0.10, 0.32)                              | 313           | 0.05 (-0.23, 0.33)                              | 286            | 0.15 (-0.17, 0.46)                              |
| p-trend                            |           | 0.29                                            |               | 0.68                                            |                | 0.33                                            |
| Frequency of use                   |           |                                                 |               |                                                 |                |                                                 |
| Non-users                          | 1301      | Reference                                       | 471           | Reference                                       | 830            | Reference                                       |
| Past users                         | 678       | 0.07 (-0.12, 0.27)                              | 365           | -0.04 (-0.30, 0.23)                             | 313            | 0.18 (-0.11, 0.47)                              |
| Current users                      |           |                                                 |               |                                                 |                |                                                 |
| 1 day/wk                           | 566       | 0.22 (0.01, 0.42)                               | 337           | 0.07 (-0.20, 0.33)                              | 229            | 0.35 (0.04, 0.67)                               |
| 2-3 days/wk                        | 429       | 0.09 (-0.14, 0.31)                              | 255           | 0.11 (-0.18, 0.41)                              | 174            | -0.01 (-0.36, 0.34)                             |
| 4-5 days/wk                        | 131       | -0.08 (-0.44, 0.28)                             | 59            | 0.03 (-0.48, 0.54)                              | 72             | -0.17 (-0.68, 0.34)                             |
| 6+ days/wk                         | 274       | -0.05 (-0.31, 0.22)                             | 74            | -0.23 (-0.69, 0.24)                             | 200            | 0.04 (-0.29, 0.37)                              |
| p-trend                            |           | 0.61                                            |               | 0.83                                            |                | 0.70                                            |

| Intake category             | All women |                                           | Premenopausal |                                           | Postmenopausal |                                           |
|-----------------------------|-----------|-------------------------------------------|---------------|-------------------------------------------|----------------|-------------------------------------------|
|                             | N         | Full Models,<br>β and 95% CI <sup>a</sup> | N             | Full Models,<br>β and 95% CI <sup>b</sup> | N              | Full Models,<br>β and 95% CI <sup>c</sup> |
| <b>ANY NSAIDs USE</b>       |           |                                           |               |                                           |                |                                           |
| Regular use (≥2 times/week) |           |                                           |               |                                           |                |                                           |
| Non-users                   | 602       | Reference                                 | 287           | Reference                                 | 315            | Reference                                 |
| Past users                  | 892       | -0.02 (-0.23, 0.19)                       | 432           | -0.17 (-0.46, 0.12)                       | 460            | 0.14 (-0.16, 0.44)                        |
| Current users               |           |                                           |               |                                           |                |                                           |
| <5 yrs                      | 895       | 0.11 (-0.10, 0.32)                        | 466           | 0.02 (-0.27, 0.30)                        | 429            | 0.21 (-0.10, 0.52)                        |
| ≥5 yrs                      | 1528      | 0.05 (-0.14, 0.24)                        | 569           | -0.00 (-0.27, 0.27)                       | 959            | 0.10 (-0.17, 0.37)                        |
| p-trend                     |           | 0.39                                      |               | 0.52                                      |                | 0.65                                      |

**Abbreviations:** CI- confidence interval; NSAIDs-non-steroid anti-inflammatory drugs

<sup>a</sup> Adjusted for age (continuous), BMI (continuous), age at menarche (<12, 12, 13, >13), menopausal status/postmenopausal hormone use (premenopausal, postmenopausal/no hormones, postmenopausal/past hormones, postmenopausal/current hormones, postmenopausal/past/ unknown current), a family history of breast cancer (Yes/No), a history of benign breast disease (Yes/No), NHS cohort (NHSI, NHSII), alcohol use (none, >0-<5, ≥5 g/day), and parity and age at first child's birth (nulliparous, parous with age at first birth <25, parous with age at first birth ≥25)

<sup>b</sup> Adjusted for age (continuous), BMI (continuous), age at menarche (<12, 12, 13, >13), a family history of breast cancer (Yes/No), a history of benign breast disease (Yes/No), NHS cohort (NHSI, NHSII), alcohol use (none, >0-<5, ≥5 g/day), and parity and age at first child's birth (nulliparous, parous with age at first birth <25, parous with age at first birth ≥25)

<sup>c</sup> Adjusted for age (continuous), BMI (continuous), , age at menarche (<12, 12, 13, >13), a family history of breast cancer (Yes/No), a history of benign breast disease (Yes/No), NHS cohort (NHSI, NHSII), alcohol use (none, >0-<5, ≥5 g/day), hormone therapy (none, past, current, past/unknown current), age at menopause (<46, 46-<50, 50-<55, ≥55, unknown), and parity and age at first child's birth (nulliparous, parous with age at first birth <25, parous with age at first birth ≥25)

**Supplemental table 2.** Associations of aspirin and other NSAIDs with non-dense area of the breast, by menopausal status

| Intake category                     | All women |                                                 | Premenopausal |                                                 | Postmenopausal |                                                 |
|-------------------------------------|-----------|-------------------------------------------------|---------------|-------------------------------------------------|----------------|-------------------------------------------------|
|                                     | N         | Full Models,<br>$\beta$ and 95% CI <sup>a</sup> | N             | Full Models,<br>$\beta$ and 95% CI <sup>b</sup> | N              | Full Models,<br>$\beta$ and 95% CI <sup>c</sup> |
| <b>ASPIRIN USE</b>                  |           |                                                 |               |                                                 |                |                                                 |
| Regular use ( $\geq 2$ times/week)  |           |                                                 |               |                                                 |                |                                                 |
| Non-users                           | 1348      | Reference                                       | 867           | Reference                                       | 481            | Reference                                       |
| Past users                          | 965       | -0.16 (-0.35, 0.03)                             | 363           | -0.21 (-0.45, 0.04)                             | 602            | -0.05 (-0.33, 0.23)                             |
| Current users                       |           |                                                 |               |                                                 |                |                                                 |
| <5 yrs                              | 339       | -0.27 (-0.52, -                                 | 177           | -0.38 (-0.69, -0.07)                            | 162            | -0.03 (-0.44, 0.37)                             |
| $\geq 5$ yrs                        | 1023      | 0.01)                                           | 286           | -0.01 (-0.30, 0.28)                             | 737            | 0.09 (-0.19, 0.38)                              |
| p-trend                             |           | -0.02 (-0.21, 0.18)                             |               | 0.34                                            |                | 0.38                                            |
|                                     |           | 0.81                                            |               |                                                 |                |                                                 |
| Frequency of use                    |           |                                                 |               |                                                 |                |                                                 |
| Non-users                           | 1343      | Reference                                       | 862           | Reference                                       | 481            | Reference                                       |
| Past users                          | 1072      | -0.20 (-0.38, -                                 | 389           | -0.26 (-0.51, -0.02)                            | 683            | -0.07 (-0.34, 0.21)                             |
| Current users                       |           |                                                 |               |                                                 |                |                                                 |
| 1 day/wk                            | 632       | 0.01)                                           | 264           | -0.29 (-0.58, 0.01)                             | 368            | 0.03 (-0.29, 0.36)                              |
| 2-3 days/wk                         | 310       | -0.18 (-0.40, 0.04)                             | 114           | -0.07 (-0.46, 0.31)                             | 196            | 0.19 (-0.20, 0.57)                              |
| 4-5 days/wk                         | 142       | 0.02 (-0.25, 0.30)                              | 37            | 0.07 (-0.57, 0.71)                              | 105            | 0.20 (-0.29, 0.68)                              |
| 6+ days/wk                          | 457       | 0.09 (-0.28, 0.47)                              | 107           | -0.11 (-0.50, 0.29)                             | 350            | -0.05 (-0.37, 0.28)                             |
| p-trend                             |           | -0.14 (-0.39, 0.10)                             |               | 0.89                                            |                | 0.87                                            |
|                                     |           | 0.98                                            |               |                                                 |                |                                                 |
| Dosage (number of tablets per week) |           |                                                 |               |                                                 |                |                                                 |
| Non-users                           | 759       | Reference                                       | 390           | Reference                                       | 369            | Reference                                       |
| Past users                          |           |                                                 |               |                                                 |                |                                                 |
| <2                                  | 410       | -0.10 (-0.40, 0.19)                             | 108           | -0.11 (-0.62, 0.41)                             | 302            | -0.04 (-0.41, 0.32)                             |
| 2-5                                 | 124       | -0.40 (-0.84, 0.05)                             | 24            | -0.04 (-0.95, 0.86)                             | 100            | -0.43 (-0.94, 0.09)                             |
| >5                                  | 87        | 0.49 (-0.02, 1.01)                              | 13            | 0.84 (-0.36, 2.04)                              | 74             | 0.46 (-0.12, 1.04)                              |
| p-trend                             |           | 0.04                                            |               | 0.13                                            |                | 0.18                                            |
| Current users                       |           |                                                 |               |                                                 |                |                                                 |
| <2                                  | 450       | -0.20 (-0.48, 0.08)                             | 154           | -0.51 (-0.95, -0.07)                            | 296            | 0.05 (-0.31, 0.41)                              |
| 2-5                                 | 332       | -0.09 (-0.41, 0.22)                             | 65            | 0.37 (-0.23, 0.96)                              | 267            | -0.13 (-0.50, 0.25)                             |
| >5                                  | 379       | 0.12 (-0.17, 0.41)                              | 100           | -0.12 (-0.61, 0.38)                             | 279            | 0.29 (-0.07, 0.66)                              |
| p-trend                             |           | 0.14                                            |               | 0.58                                            |                | 0.12                                            |

| Intake category                   | All women |                                           | Premenopausal |                                           | Postmenopausal |                                           |
|-----------------------------------|-----------|-------------------------------------------|---------------|-------------------------------------------|----------------|-------------------------------------------|
|                                   | N         | Full Models,<br>β and 95% CI <sup>a</sup> | N             | Full Models,<br>β and 95% CI <sup>b</sup> | N              | Full Models,<br>β and 95% CI <sup>c</sup> |
| Duration (years of use by status) |           |                                           |               |                                           |                |                                           |
| Non-users                         | 1348      | Reference                                 | 867           | Reference                                 | 481            | Reference                                 |
| Past users                        |           |                                           |               |                                           |                |                                           |
| <2                                | 36        | 0.00 (-0.70, 0.70)                        | 17            | -0.28 (-1.20, 0.63)                       | 19             | 0.29 (-0.75, 1.32)                        |
| 2-5                               | 433       | -0.35 (-0.58, -                           | 215           | -0.35 (-0.63, -0.06)                      | 218            | -0.24 (-0.60, 0.12)                       |
| >5                                | 496       | 0.12)                                     | 131           | 0.06 (-0.32, 0.44)                        | 365            | 0.06 (-0.27, 0.39)                        |
| p-trend                           |           | 0.02 (-0.22, 0.26)                        |               | 0.74                                      |                | 0.40                                      |
| Current users                     |           | 0.57                                      |               |                                           |                |                                           |
| <2                                | 142       |                                           | 81            | -0.24 (-0.68, 0.19)                       | 61             | 0.32 (-0.28, 0.92)                        |
| 2-5                               | 253       | -0.04 (-0.41, 0.32)                       | 126           | -0.33 (-0.69, 0.03)                       | 127            | -0.03 (-0.48, 0.41)                       |
| >5                                | 967       | -0.25 (-0.53, 0.04)                       | 256           | -0.01 (-0.31, 0.29)                       | 711            | 0.07 (-0.21, 0.36)                        |
| p-trend                           |           | -0.02 (-0.22, 0.19)                       |               | 0.69                                      |                | 0.72                                      |
|                                   |           | 0.72                                      |               |                                           |                |                                           |
| <b>NSAIDs</b>                     |           |                                           |               |                                           |                |                                           |
| Regular use (≥2 times/week)       |           |                                           |               |                                           |                |                                           |
| Non-users                         | 1310      | Reference                                 | 479           | Reference                                 | 831            | Reference                                 |
| Past users                        | 680       | 0.05 (-0.15, 0.26)                        | 367           | 0.09 (-0.18, 0.35)                        | 313            | 0.04 (-0.27, 0.34)                        |
| Current users                     |           |                                           |               |                                           |                |                                           |
| <5 yrs                            | 877       | -0.02 (-0.20, 0.16)                       | 436           | -0.01 (-0.25, 0.23)                       | 441            | 0.01 (-0.25, 0.28)                        |
| ≥5 yrs                            | 599       | 0.06 (-0.16, 0.28)                        | 313           | 0.22 (-0.06, 0.50)                        | 286            | -0.06 (-0.40, 0.27)                       |
| p-trend                           |           | 0.83                                      |               | 0.28                                      |                | 0.80                                      |
| Frequency of use                  |           |                                           |               |                                           |                |                                           |
| Non-users                         | 1301      | Reference                                 | 471           | Reference                                 | 830            | Reference                                 |
| Past users                        | 678       | 0.03 (-0.17, 0.24)                        | 365           | 0.06 (-0.21, 0.33)                        | 313            | 0.03 (-0.28, 0.34)                        |
| Current users                     |           |                                           |               |                                           |                |                                           |
| 1 day/wk                          | 566       | -0.04 (-0.25, 0.17)                       | 337           | 0.00 (-0.26, 0.26)                        | 229            | -0.00 (-0.34, 0.33)                       |
| 2-3 days/wk                       | 429       | 0.02 (-0.21, 0.26)                        | 255           | 0.04 (-0.25, 0.33)                        | 174            | 0.08 (-0.29, 0.46)                        |
| 4-5 days/wk                       | 131       | -0.17 (-0.55, 0.21)                       | 59            | 0.23 (-0.28, 0.74)                        | 72             | -0.52 (-1.06, 0.03)                       |
| 6+ days/wk                        | 274       | 0.13 (-0.15, 0.40)                        | 74            | 0.37 (-0.10, 0.83)                        | 200            | 0.06 (-0.29, 0.41)                        |
| p-trend                           |           | 0.75                                      |               | 0.22                                      |                | 0.86                                      |

| Intake category             | All women |                                           | Premenopausal |                                           | Postmenopausal |                                           |
|-----------------------------|-----------|-------------------------------------------|---------------|-------------------------------------------|----------------|-------------------------------------------|
|                             | N         | Full Models,<br>β and 95% CI <sup>a</sup> | N             | Full Models,<br>β and 95% CI <sup>b</sup> | N              | Full Models,<br>β and 95% CI <sup>c</sup> |
| <b>ANY NSAIDs USE</b>       |           |                                           |               |                                           |                |                                           |
| Regular use (≥2 times/week) |           |                                           |               |                                           |                |                                           |
| Non-users                   | 602       | Reference                                 | 287           | Reference                                 | 315            | Reference                                 |
| Past users                  | 892       | -0.03 (-0.25, 0.19)                       | 432           | 0.01 (-0.28, 0.30)                        | 460            | -0.07 (-0.39, 0.26)                       |
| Current users               |           |                                           |               |                                           |                |                                           |
| <5 yrs                      | 895       | -0.02 (-0.24, 0.20)                       | 466           | -0.08 (-0.37, 0.20)                       | 429            | 0.09 (-0.24, 0.42)                        |
| ≥5 yrs                      | 1528      | 0.03 (-0.17, 0.23)                        | 569           | 0.09 (-0.18, 0.37)                        | 959            | 0.04 (-0.24, 0.33)                        |
| p-trend                     |           | 0.58                                      |               | 0.56                                      |                | 0.52                                      |

**Abbreviations:** CI- confidence interval; NSAIDs-non-steroid anti-inflammatory drugs

<sup>a</sup> Adjusted for age (continuous), BMI (continuous), age at menarche (<12, 12, 13, >13), menopausal status/postmenopausal hormone use (premenopausal, postmenopausal/no hormones, postmenopausal/past hormones, postmenopausal/current hormones, postmenopausal/past/ unknown current), a family history of breast cancer (Yes/No), a history of benign breast disease (Yes/No), NHS cohort (NHSI, NHSII), alcohol use (none, >0-<5, ≥5 g/day), and parity and age at first child's birth (nulliparous, parous with age at first birth <25, parous with age at first birth ≥25)

<sup>b</sup> Adjusted for age (continuous), BMI (continuous), age at menarche (<12, 12, 13, >13), a family history of breast cancer (Yes/No), a history of benign breast disease (Yes/No), NHS cohort (NHSI, NHSII), alcohol use (none, >0-<5, ≥5 g/day), and parity and age at first child's birth (nulliparous, parous with age at first birth <25, parous with age at first birth ≥25)

<sup>c</sup> Adjusted for age (continuous), BMI (continuous), , age at menarche (<12, 12, 13, >13), a family history of breast cancer (Yes/No), a history of benign breast disease (Yes/No), NHS cohort (NHSI, NHSII), alcohol use (none, >0-<5, ≥5 g/day), hormone therapy (none, past, current, past/unknown current), age at menopause (<46, 46-<50, 50-<55, ≥55, unknown), and parity and age at first child's birth (nulliparous, parous with age at first birth <25, parous with age at first birth ≥25)
